# Supplementary material
Source: PubMed Central journal article supplement (PMC6013263)
Supplement: NIHMS973733-supplement-SFig1.pdf [file NIHMS973733-supplement-SFig1.pdf]

## Supplemental Figures and Legends

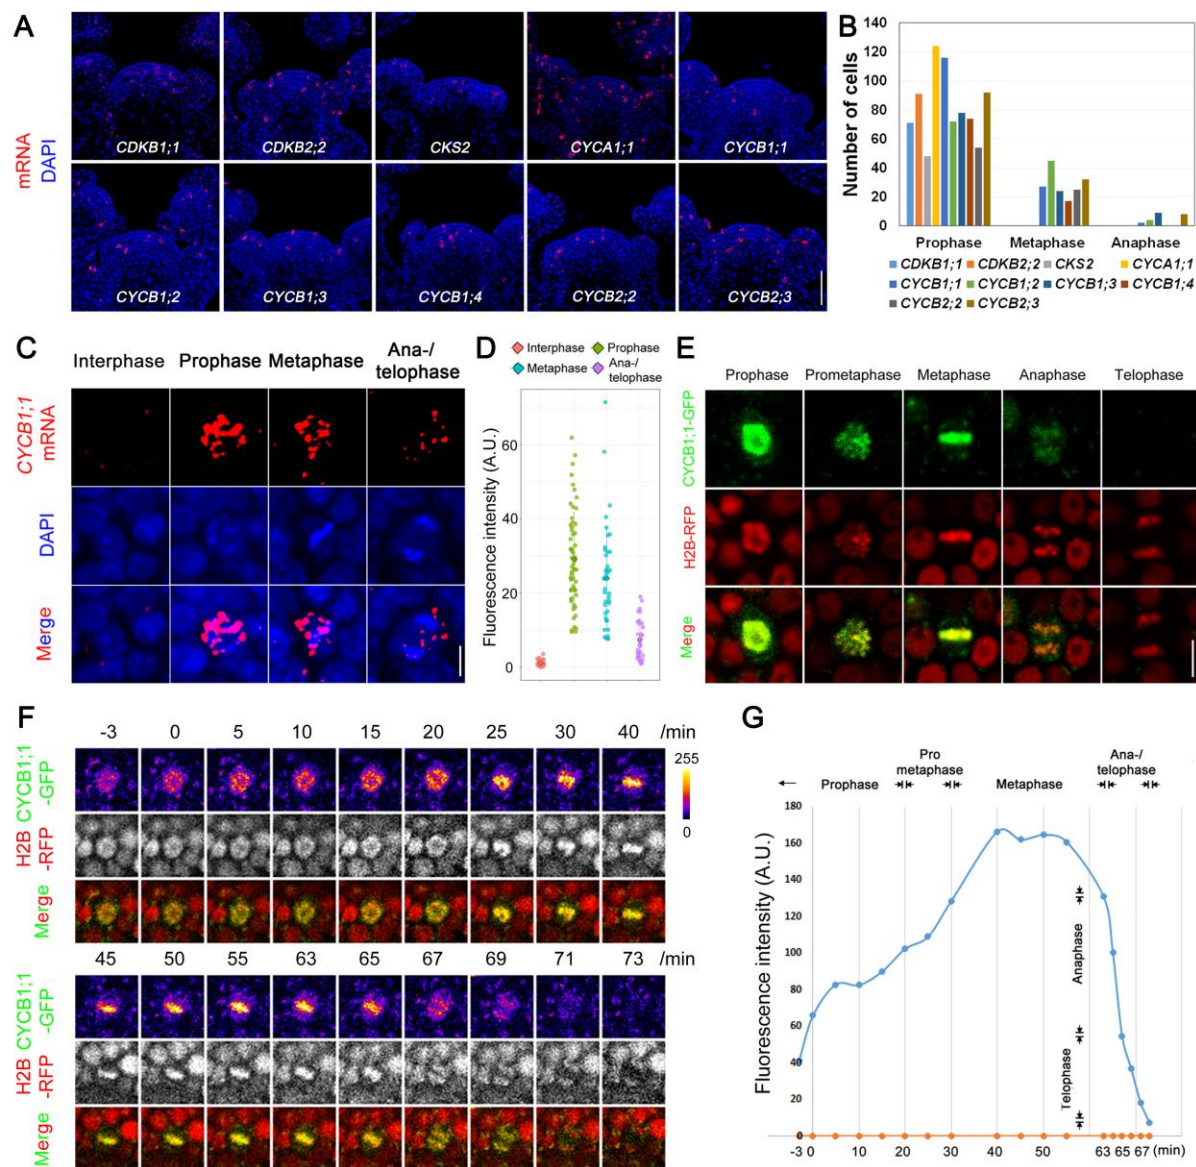

**Figure S1. Mitosis-Specific Expression of Cell Cycle Genes and Rapid *CYCB1;1* Protein Degradation at Metaphase-to-Anaphase Transition. Related to Figure 1.**

(A) Expression patterns of G2/M cell cycle genes. Scale bar, 50  $\mu$ m.

(B) Quantification of the number of cells expressing cell cycle genes at different mitotic stages.

(C) RNA FISH to show the accumulation of *CYCB1;1* transcripts at different stages of mitosis.

Scale bar, 5  $\mu$ m.

(D) *CYCB1;1* mRNA levels at different stages of mitosis, as calculated from the fluorescence intensity of RNA FISH images.

(E) *CYCB1;1*-GFP protein expression at different stages of the cell cycle. H2B-RFP is used to monitor chromosome alignment and segregation. Scale bar, 5  $\mu\text{m}$ .

(F and G) Protein dynamics of *CYCB1;1*-GFP during mitosis. GFP fluorescence intensity is shown in (G).
