# Supplementary material
Source: PubMed Central journal article supplement (PMC6013263)
Supplement: NIHMS973733-supplement-SFig3.pdf [file NIHMS973733-supplement-SFig3.pdf]

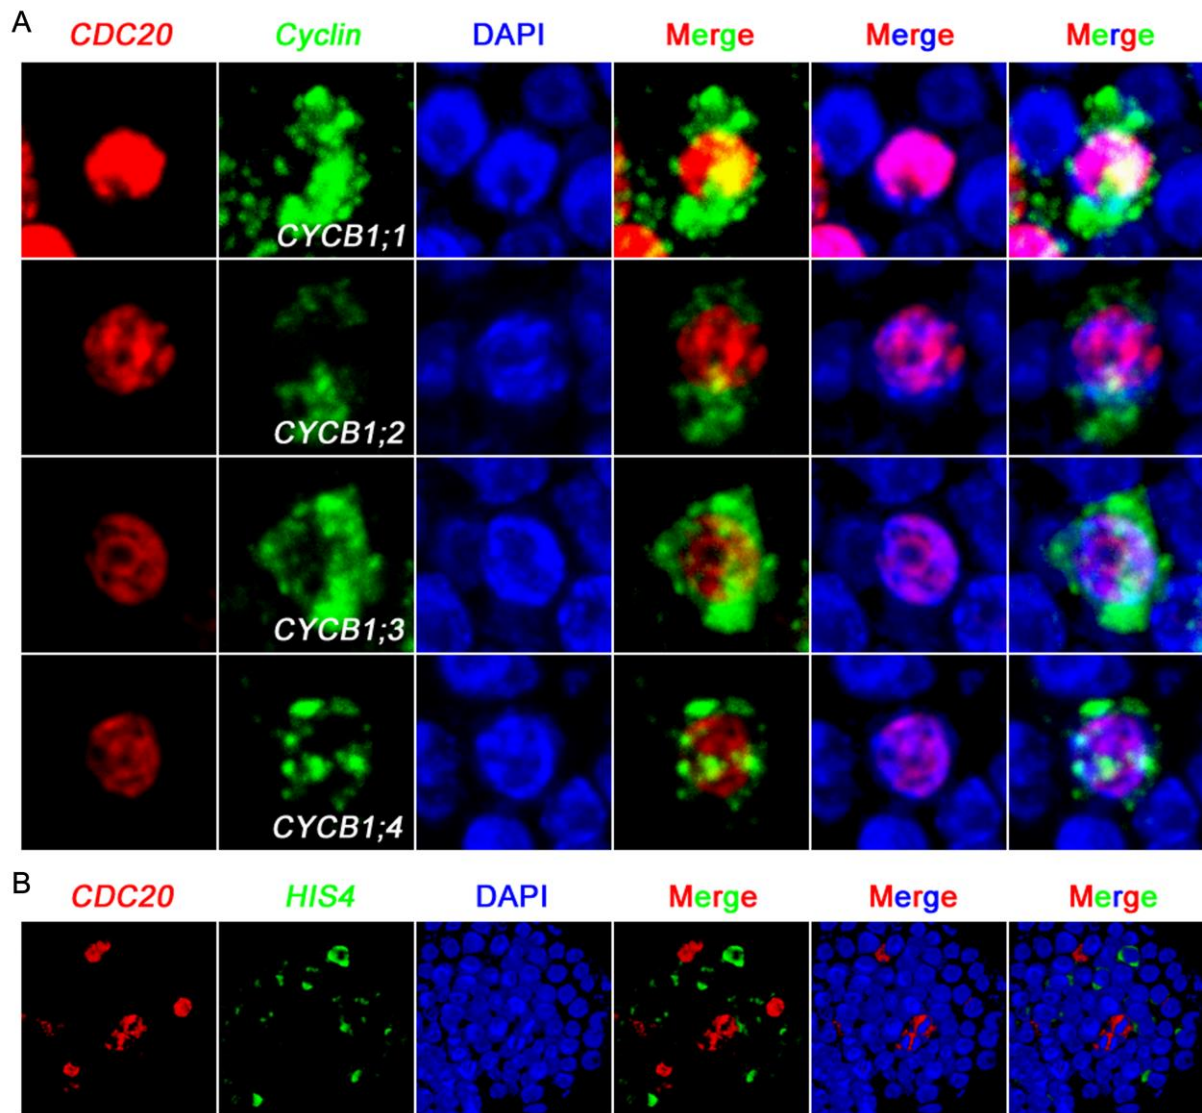

**Figure S3. 3-D Projection of Confocal Images to Show *CDC20* Expression Patterns with *CYCBs* and *HIS4* in the Same Meristems. Related to Figure 3.**

(A) Nucleocytoplasmic separation of *CDC20* and *CYCB1* transcripts in prophase cells.

(B) *CDC20* does not co-express with S-phase marker *HIS4* gene.
