# Supplementary material
Source: PubMed Central journal article supplement (PMC6013263)
Supplement: NIHMS973733-supplement-SFig4.pdf [file NIHMS973733-supplement-SFig4.pdf]

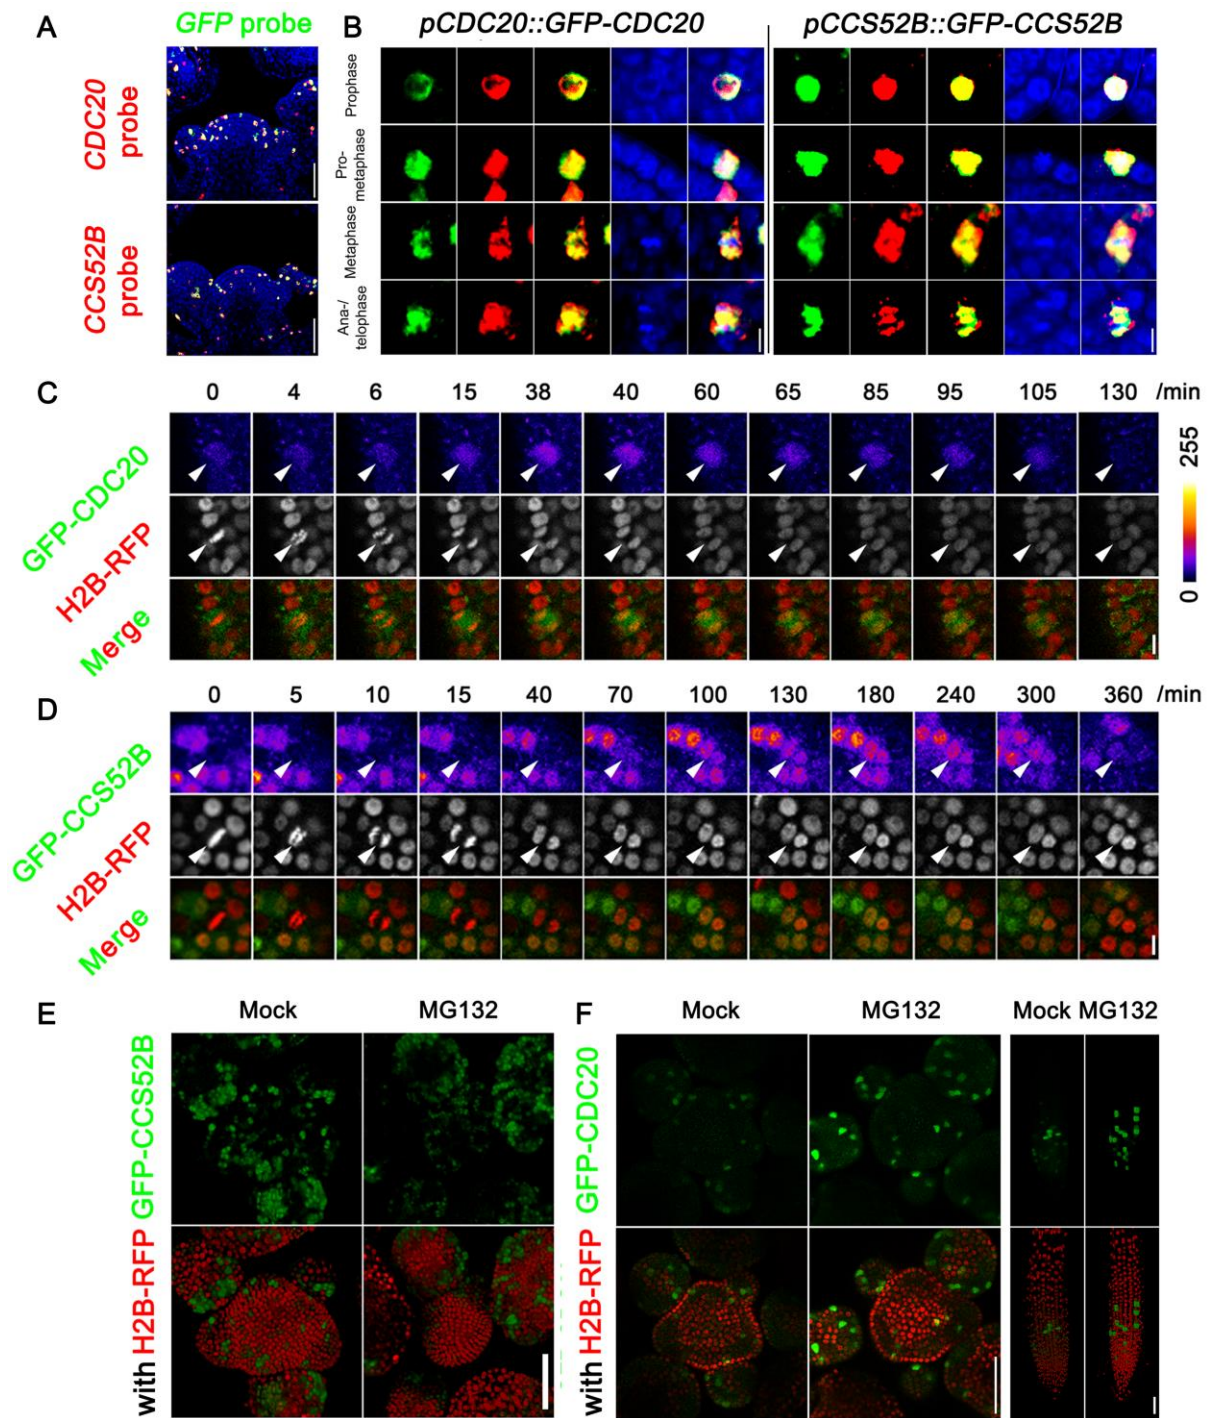

**Figure S4. Protein Dynamics of CDC20 and CCS52B during the Cell Cycle. Related to Figure 4.**

(A and B) ) Co-localization of *GFP* mRNA with *CDC20* or *CCS52B* mRNA in *pCDC20::GFP-CDC20* and *pCCS52B::GFP-CCS52B* transgenic plants. Note that fusion of *GFP* does not

affect *CDC20* or *CCS52B* mRNA nuclear localization. Scale bars, 50  $\mu\text{m}$  for SAM overview in (A) and 5  $\mu\text{m}$  for single cells in (B).

(C and D) Time-lapse imaging of GFP-*CDC20* (C) and GFP-*CCS52B* (D) protein expression in the same cell as it undergoes division. Arrowheads indicate the cells analysed. Scale bars, 5  $\mu\text{m}$ .

(E) MG132 treatment does not affect GFP-*CCS52B* protein abundance. Scale bar, 50  $\mu\text{m}$ .

(F) The amount of GFP-*CDC20* proteins in both SAM (left) and root (right) can be increased by MG132 treatment. Scale bar, 50  $\mu\text{m}$ .
