# Supplementary material
Source: PubMed Central journal article supplement (PMC6013263)
Supplement: NIHMS973733-supplement-SFig5.pdf [file NIHMS973733-supplement-SFig5.pdf]

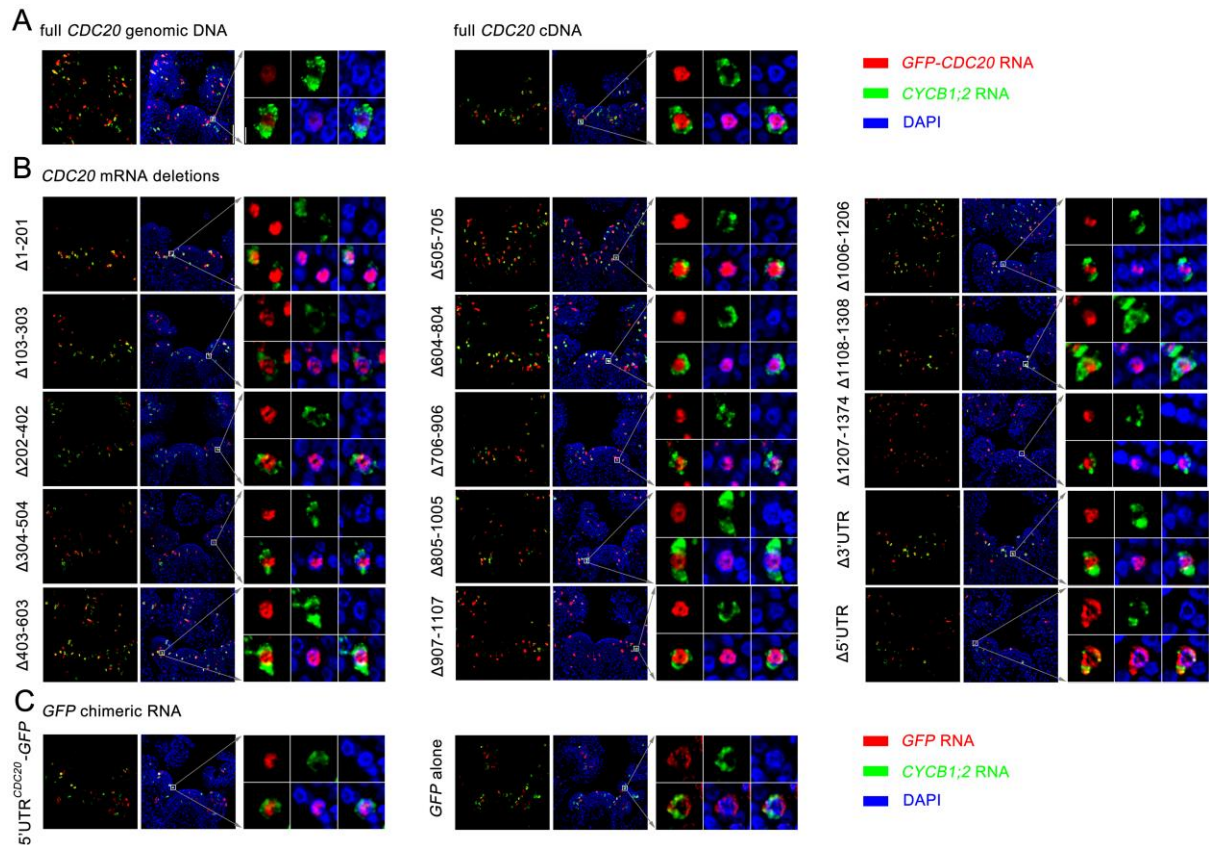

**Figure S5. 5'UTR Affects *CDC20* mRNA Nuclear Localization. Related to Figures 5 and 6.**

(A) The expression patterns of full length *GFP-CDC20* mRNAs transcribed from genomic DNA or cDNA in the shoot apex. Shown are representative meristems from one of the independent transgenic lines. Scale bar, 50  $\mu$ m for SAM overview and 5  $\mu$ m for single cells.

(B) The expression patterns of *GFP-CDC20* truncated mRNAs.

(C) The expression patterns of *GFP* chimeric mRNAs.
