# Supplementary material
Source: PubMed Central journal article supplement (PMC6013263)
Supplement: NIHMS973733-supplement-SFig6.pdf [file NIHMS973733-supplement-SFig6.pdf]

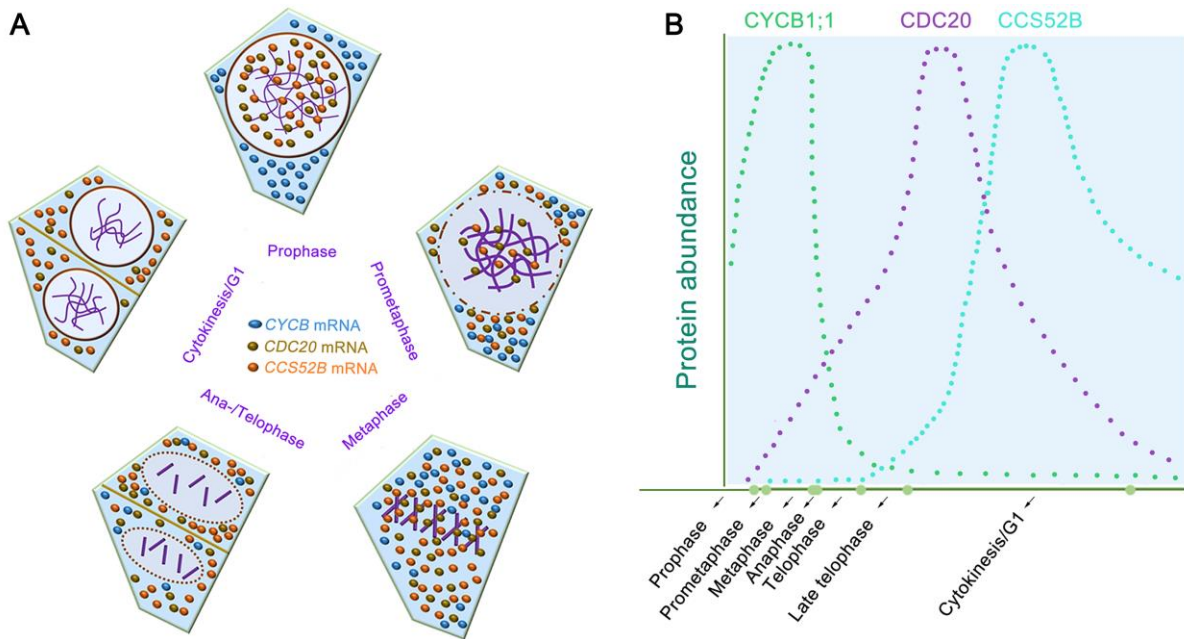

**Figure S6. Model for Cell Cycle Control by mRNA Nuclear Sequestration. Related to Figures 5 and 6.**

(A) Subcellular distribution of *CYCB*, *CDC20* and *CCS52B* mRNAs during cell cycle progression in plant stem cells.

(B) *CYCB*, *CDC20* and *CCS52B* protein dynamics. Nuclear sequestration of *CDC20* and *CCS52B* mRNAs in prophase prevents their translation to protein. Nuclear envelope breakdown at prometaphase enables redistribution of the mRNAs into the cytoplasm and subsequent protein synthesis, following which the proteins activate APC/C to destroy cyclin B proteins and other substrates.
